# Supplementary material for: Effects of the Rhizosphere Fungus Cunninghamella bertholletiae on the Solanum lycopersicum Response to Diverse Abiotic Stresses
Source: MDPI journal article supplement (doi:10.3390/ijms23168909), 2022-08-10
Supplement: s1 [file s1]

## Supplementary materials

# Effects of the Rhizosphere Fungus *Cunninghamella bertholletiae* on the *Solanum lycopersicum* Response to Diverse Abiotic Stresses

Elham Ahmed Kazerooni <sup>1,\*</sup>, Sajeewa S. N. Maharachchikumbura <sup>2</sup>,  
Abdullah Mohammed Al-Sadi <sup>3</sup>, Umer Rashid <sup>4</sup>, Il-Doo Kim <sup>1</sup>, Sang-Mo Kang <sup>1</sup> and In-Jung Lee <sup>1,\*</sup>

<sup>1</sup> Department of Applied Biosciences, Kyungpook National University,  
Daegu 41566, Korea

<sup>2</sup> School of Life Science and Technology, Center for Informational Biology, University of  
Electronic Science and Technology of China, Chengdu 611731, China

<sup>3</sup> Department of Plant Sciences, College of Agricultural and Marine Sciences,  
Sultan Qaboos University, P.O. Box 34, Al-Khoudh 123, Oman

<sup>4</sup> Institute of Nanoscience and Nanotechnology (ION2), Universiti Putra Malaysia,  
Serdang 43400, Selangor, Malaysia

\* Correspondence: elham.ghasemi.k@gmail.com (E.A.K.); ijlee@knu.ac.kr (I.-J.L.)

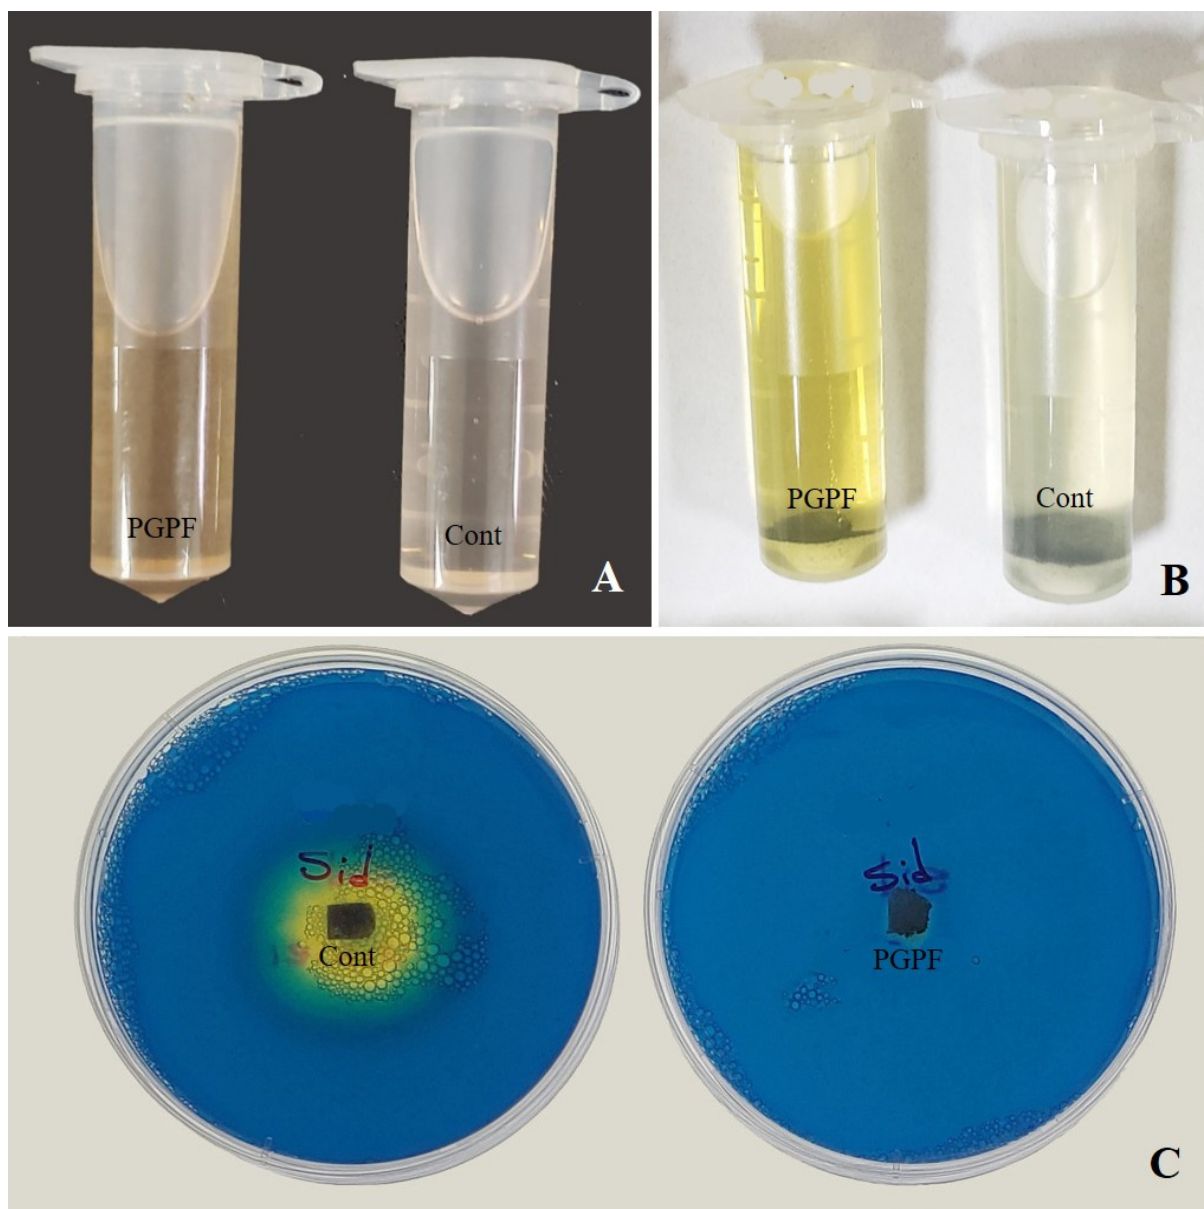

**Figure S1.** (A) IAA production, (B) Ammonia production, (C) Siderophore production of the selected fungal strain (*Cunninghamella bertholletiae*) associated with *Solanum lycopersicum* in this study.

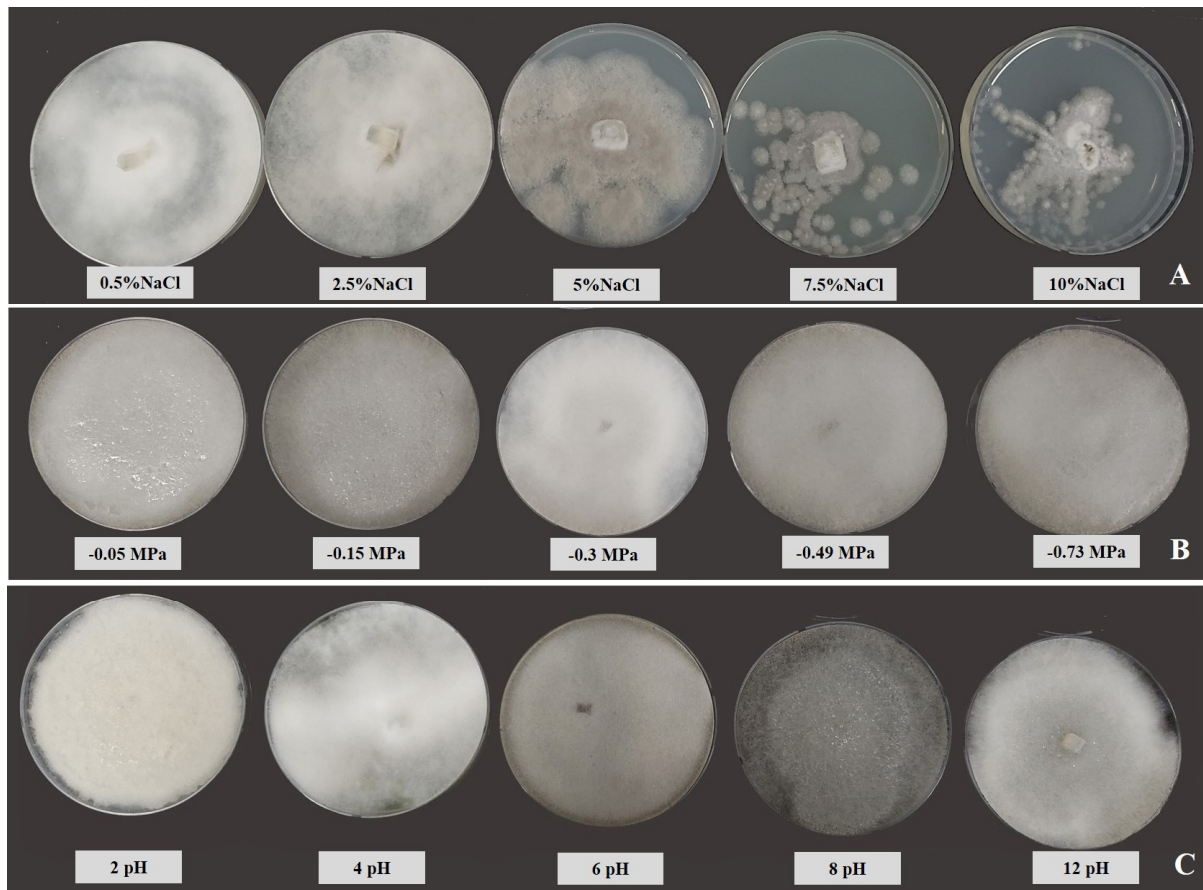

**Figure S2.** (A) Salinity (sodium chloride; NaCl), (B) Drought (polyethelene glycol; PEG 6000 Da) and (C) pH tolerance ability of the selected fungal strain (*Cunninghamella bertholletiae*) associated with *Solanum lycopersicum* in this study.

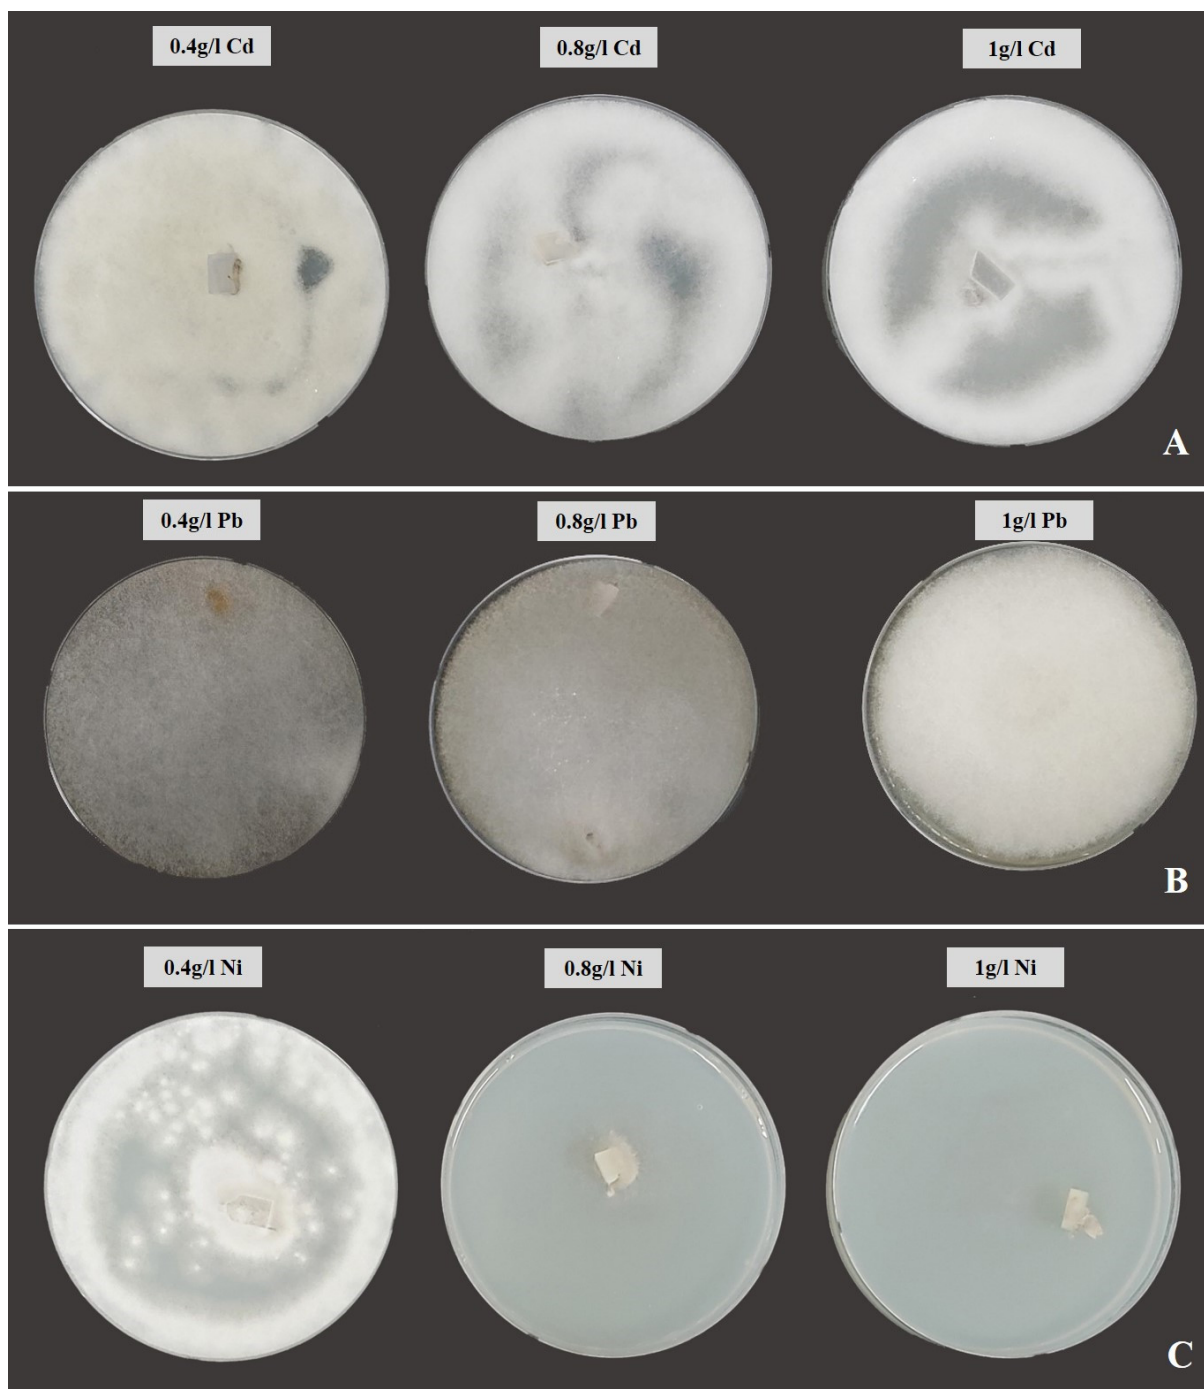

**Figure S3.** Heavy metal (Cadmium; Cd, Lead; Pb, Nickel; Ni) tolerance ability of the selected fungal strain (*Cunninghamella bertholletiae*) associated with *Solanum lycopersicum* in this study (A–C).



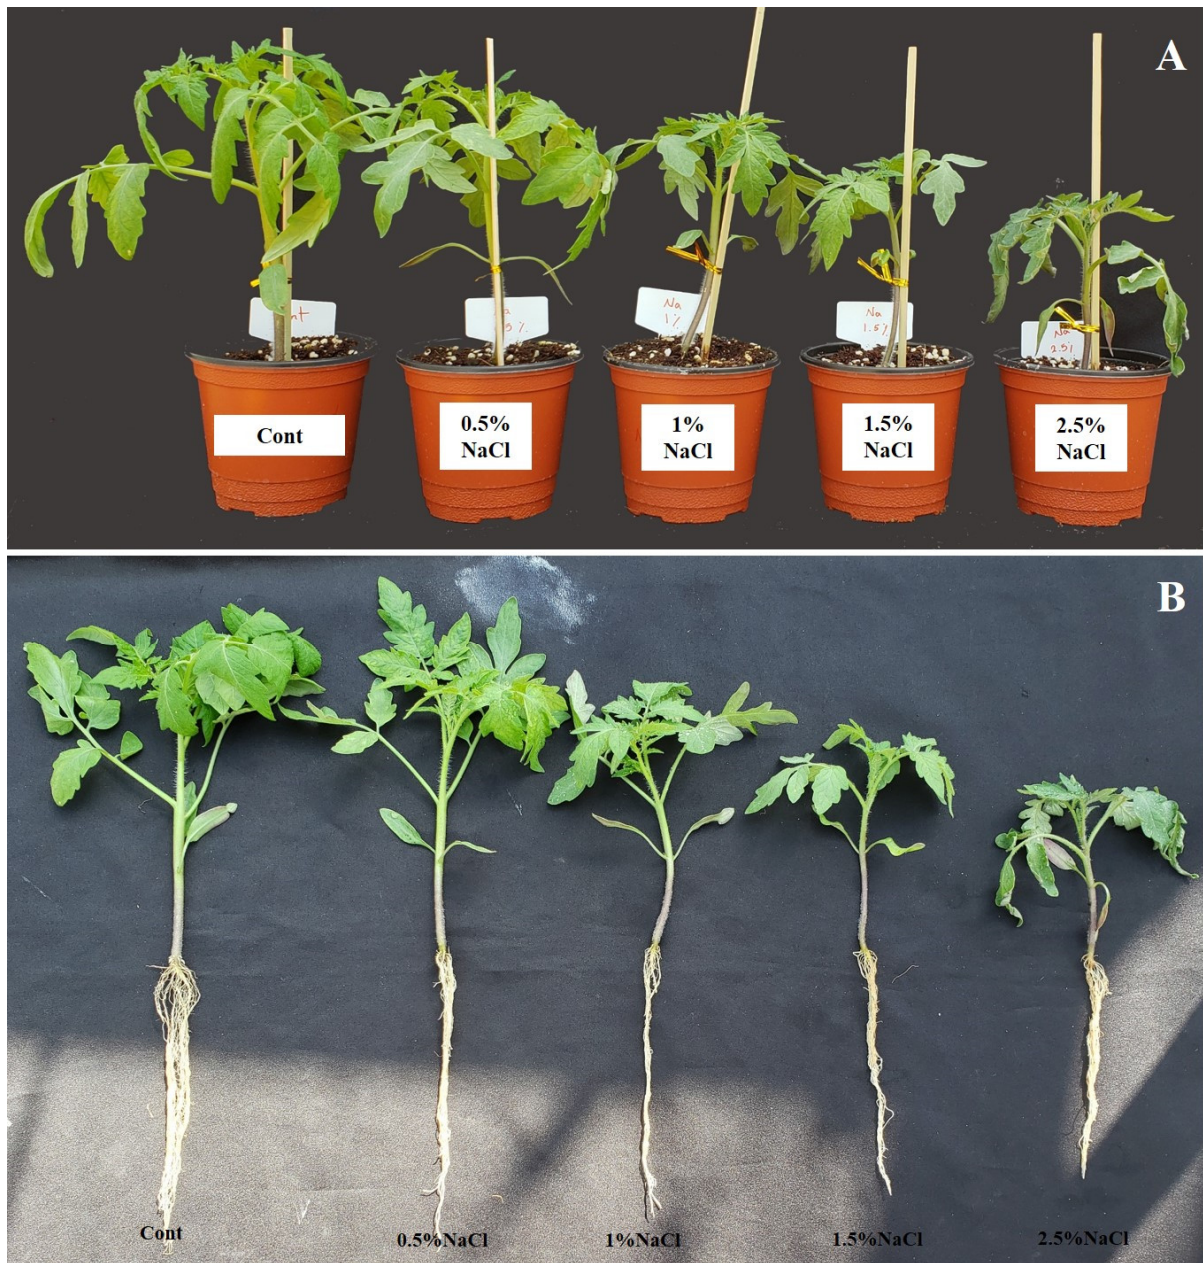

**Figure S4.** Effects of various sodium chloride (NaCl) concentrations on the growth of tomato seedlings following 10 days of treatment (**A** and **B**). Treatments: Cont (control), 0.5% NaCl, 1% NaCl, 1.5% NaCl, and 2.5% NaCl.



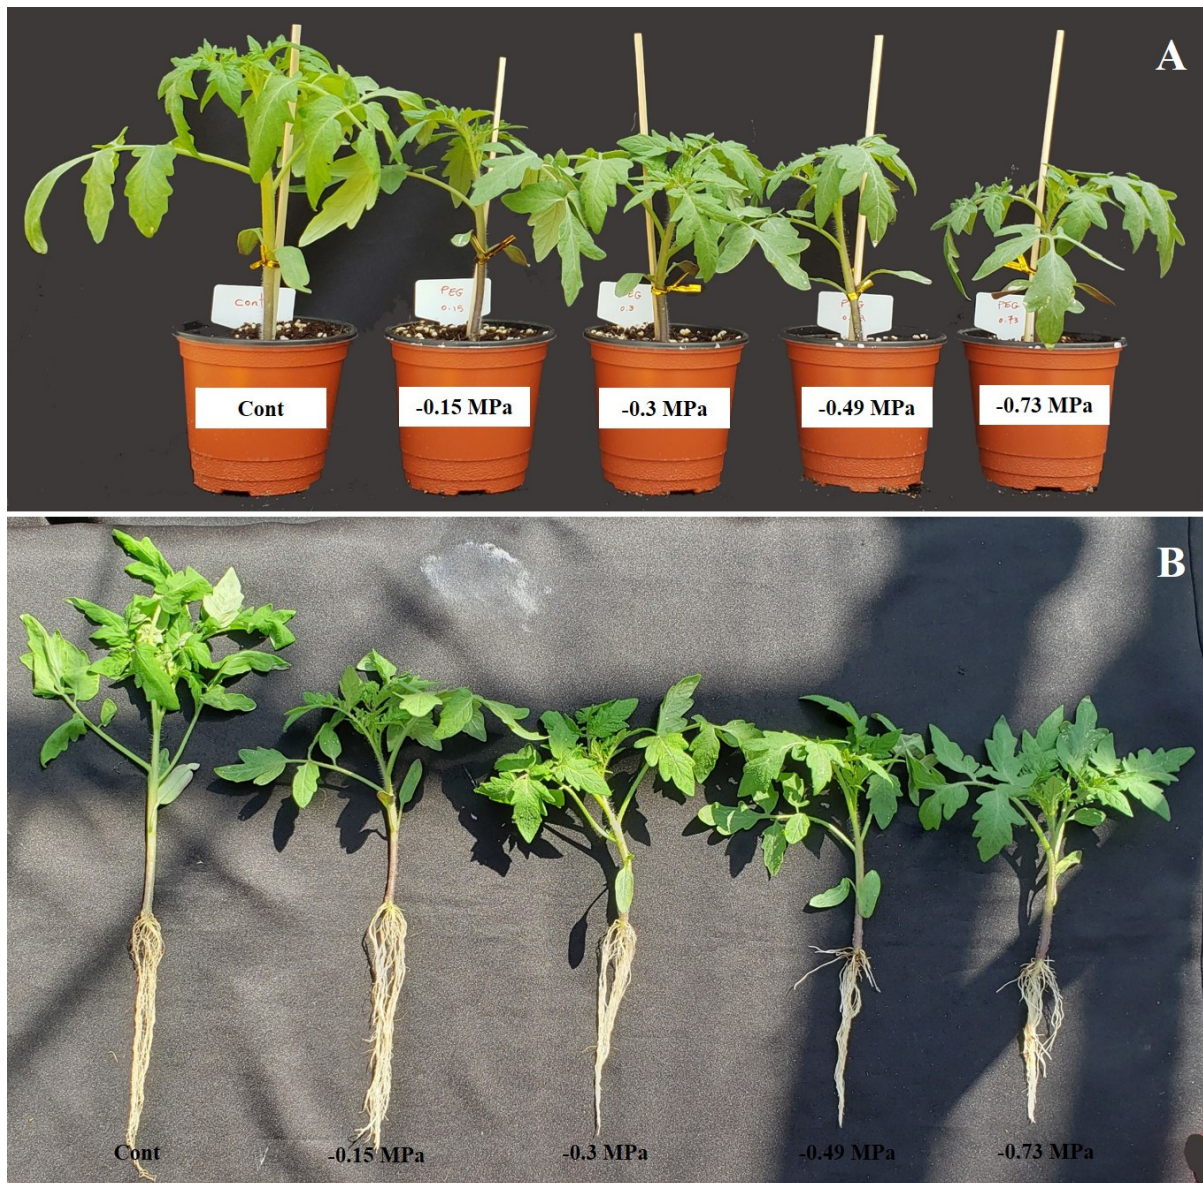

**Figure S5.** Effects of various polyethylene glycol (PEG 6000 Da) concentrations on the growth of tomato seedlings following 10 days of treatment (A and B). Treatments: Cont (control), PEG 5%; -0.15 MPa), PEG (10%; -0.3 MPa), PEG (15%; -0.49 MPa), and PEG (25%; -0.73 MPa).

**Table S1.** Effects of various sodium chloride (NaCl) concentrations on the growth of tomato seedlings. Data were calculated after 10 days of treatment.

| Treatment   | Plant height<br>(cm) | Root length<br>(cm) | Stem diameter<br>(cm) | Leaf length<br>(cm) | Leaf width<br>(cm) | Chl<br>(Spad) | Plant fresh weight<br>(g) | Plant dry weight<br>(g) | Root fresh weight<br>(g) | Root dry weight<br>(g) | No. leaf  |
|-------------|----------------------|---------------------|-----------------------|---------------------|--------------------|---------------|---------------------------|-------------------------|--------------------------|------------------------|-----------|
| Cont        | 18.1±0.64a           | 24.0±0.0a           | 0.55±0.02a            | 16.28±0.53a         | 12.56±0.70a        | 31.76±0.52a   | 10.21±0.90a               | 0.63±0.03a              | 1.17±0.45a               | 0.09±0.0a              | 8.6±0.24a |
| NaCl (0.5%) | 15.0±0.0b            | 19.5±0.0b           | 0.45±0.02b            | 13.5±0.5b           | 9.7±0.71b          | 30.03±1.28b   | 8.39±0.0b                 | 0.48±0.0b               | 0.9±0.0b                 | 0.07±0.0b              | 7.2±0.2b  |
| NaCl (1%)   | 13.8±0.37c           | 18.0±0.0c           | 0.40±0.01c            | 11.9±0.18c          | 8.3±0.46c          | 28.64±1.33c   | 5.52±0.0c                 | 0.36±0.0c               | 0.82±0.05c               | 0.06±0.0bc             | 7.2±0.2b  |
| NaCl (1.5%) | 11.7±0.12d           | 16.0±0.0d           | 0.34±0.01d            | 10.6±0.53d          | 7.7±0.7d           | 26.9±0.80d    | 4.36±0.0d                 | 0.32±0.0d               | 0.51±0.04d               | 0.05±0.0cd             | 6.8±0.2c  |
| NaCl (2.5%) | 10.0±0.54e           | 14.0±0.0e           | 0.30±0.01e            | 9.1±0.18e           | 7.1±0.55e          | 25.3±2.45e    | 3.22±0.0e                 | 0.26±0.0e               | 0.49±0.0d                | 0.04±0.0d              | 6.2±0.2d  |

Treatments: Cont (control), 0.5% NaCl, 1% NaCl, 1.5% NaCl, and 2.5% NaCl. Values show the means  $\pm$  SD (n = 5) and significant differences at  $p < 0.05$  (Tukey test). Data within the same column followed by different lowercase letters are significantly different.

**Table S2.** Effects of various polyethylene glycol (PEG 6000 Da) concentrations on the growth of tomato seedlings. Data were calculated after 10 days of treatment.

| Treatment   | Plant height<br>(cm) | Root length<br>(cm) | Stem diameter<br>(cm) | Leaf length<br>(cm) | Leaf width<br>(cm) | Chl<br>(Spad) | Plant fresh weight<br>(g) | Plant dry weight<br>(g) | Root fresh weight<br>(g) | Root dry weight<br>(g) | No. leaf  |
|-------------|----------------------|---------------------|-----------------------|---------------------|--------------------|---------------|---------------------------|-------------------------|--------------------------|------------------------|-----------|
| 10DAT       |                      |                     |                       |                     |                    |               |                           |                         |                          |                        |           |
| Cont        | 18.1±0.64a           | 24.0±0.0a           | 0.55±0.02a            | 16.28±0.53<br>a     | 12.56±0.70a        | 31.76±0.52a   | 10.21±0.90a               | 0.63±0.03a              | 1.17±0.45a               | 0.09±0.0a              | 8.6±0.24a |
| PEG (-0.15) | 12.2±0.48b           | 19.0±0.0b           | 0.44±0.0b             | 12.5±0.22b          | 9.3±0.64b          | 29.7±1.68b    | 7.05±0.0b                 | 0.45±0.0b               | 1.13±0.0b                | 0.07±0.0b              | 7.2±0.2b  |
| PEG (-0.30) | 12.1±0.55c           | 14.5±0.0c           | 0.38±0.01c            | 11.7±0.12b<br>c     | 9.1±0.18b          | 28.66±0.57b   | 7.0±0.0b                  | 0.43±0.0b               | 1.04±0.06c               | 0.06±0.0c              | 7.0±0.0b  |
| PEG (-0.49) | 11.8±0.48<br>d       | 12.5±0.0<br>d       | 0.36±0.01c<br>d       | 11.4±0.36c          | 8.5±0.22c          | 25.32±1.68c   | 6.14±0.0c                 | 0.41±0.0bc              | 0.93±0.05d               | 0.05±0.0d              | 6.8±0.2c  |
| PEG (-0.73) | 10.6±0.53e           | 11.0±0.0e           | 0.34±0.02d            | 10.6±0.4d           | 8.0±0.31d          | 21.7±1.38d    | 5.8±0.0d                  | 0.38±0.01c              | 0.91±0.0e                | 0.04±0.0e              | 6.4±0.24d |

Treatments: Cont (control), PEG 5%; -0.15 MPa), PEG (10%; -0.3 MPa), PEG (15%; -0.49 MPa), and PEG (25%; -0.73 MPa). Values show the means ± SD (n = 5) and significant differences at p < 0.05 (Tukey test). Data within the same column followed by different lowercase letters are significantly different.



**Table S3.** Physiochemical properties of soil samples during 10 days of treatment.

| Sample name | Soil texture | pH          | EC<br>(mS)  | Moisture<br>(%) |
|-------------|--------------|-------------|-------------|-----------------|
| Cont        | sandy loam   | 8.0±0.0ab   | 0.03±0.0f   | 83.0±0.1e       |
| PGPF        | sandy loam   | 7.95±0.05ab | 0.07±0.01f  | 93.0±0.1c       |
| S           | sandy loam   | 6.7±0.01c   | 12.0±0.09a  | 100.0±0.0a      |
| S+PGPF      | sandy loam   | 7.7±0.0b    | 5.35±0.25b  | 96.0±0.9b       |
| Dr          | sandy loam   | 7.7±0.1b    | 0.63±0.05de | 45.0±0.0f       |
| Dr+PGPF     | sandy loam   | 8.0±0.0a    | 0.04±0.0f   | 85.0±0.1d       |
| Cd          | sandy loam   | 5.5±0.05d   | 1.08±0.02cd | 100.0±0.0a      |
| Cd+PGPF     | sandy loam   | 8.1±0.1a    | 0.15±0.01ef | 96.0±0.18b      |
| Pb          | sandy loam   | 5.0±0.15d   | 1.25±0.01c  | 100.0±0.0a      |
| Pb+PGPF     | sandy loam   | 8.0±0.05ab  | 0.06±0.01f  | 98.0±0.2ab      |

Treatments: Cont (control), PGPF (*Cunninghamella bertholletiae*), S (1.5% sodium chloride), S (1.5% sodium chloride) + PGPF (*Cunninghamella bertholletiae*), Dr (25% polyethylene glycol), Dr (25% polyethylene glycol) + PGPF (*Cunninghamella bertholletiae*), Cd (3mM cadmium), Cd (3mM cadmium) + PGPF (*Cunninghamella bertholletiae*), Pb (3mM lead), and Pb (3mM lead) + PGPF (*Cunninghamella bertholletiae*). Values are shown as the means ± SD (n = 5) and significant differences at p < 0.05 (Tukey test). Data within the same column followed by different lowercase letters are significantly different.

**Table S4.** Primers used for relative gene expression analysis.

| Gene symbol | Primers (5'–3') Forward/reverse                                    |
|-------------|--------------------------------------------------------------------|
| SlACCase    | 5'-CGCGATGAGGTTAGGTAAAAGGCA-3'<br>5'-GTCGATTCCCTTAAAAGTGGACGCA-3'  |
| SlAOS       | 5'-CCGGCGGGAAGATCACGATG-3'<br>5'-TCGAAAACGGCGTCGTGTGA-3'           |
| SlICS       | 5'-GGCAATAGATGCACTTCAGGCCA-3'<br>5'-CGCATGGTCCCAAGACGCTTT-3'       |
| SlRBOHD     | 5'-TCAGGTCAAGCATCAAAGCCGTT-3'<br>5'-TGGTGAAACCGCAGCACAGT-3'        |
| SlGRAS6     | 5'-AAACCAAAGAGACCAGCTTCTGCG-3'<br>5'-AATAAAGTGCACCTGCCTCCTCCT-3'   |
| SlTAF1      | 5'-CACCATGACAGCAGCTGAATTGC-3'<br>5'-TCAAAAAGGCTTGTGCAGGTGCA-3'     |
| SlZH13      | 5'-ATGCCACTGATGGCTGTGGA-3'<br>5'-TGCGGTGGAAGTTACGGTGA-3'           |
| SlRING1     | 5'-TTGTGAGATGTCAGCACGAA-3'<br>5'-TCACCGAAGAAGAACAGCAC-3'           |
| SlCDF3      | 5'-GCTTGAGGGTCTTCCTCAGTTGA-3'<br>5'-AAAATCCTAAGACTCCATCAGAATCAG-3' |
| SlActin     | 5'-GGGATGGAGAAGTTTGGTGGTGG-3'<br>5'-CTTCGACCAAGGGATGGTGTAGC-3'     |
